# Supplementary figures and images for: Low-cost experimentation for the study of droplet microfluidics
Source: Royal Society of Chemistry journal article supplement (doi:10.1039/c4lc00424h), 2014-08-05

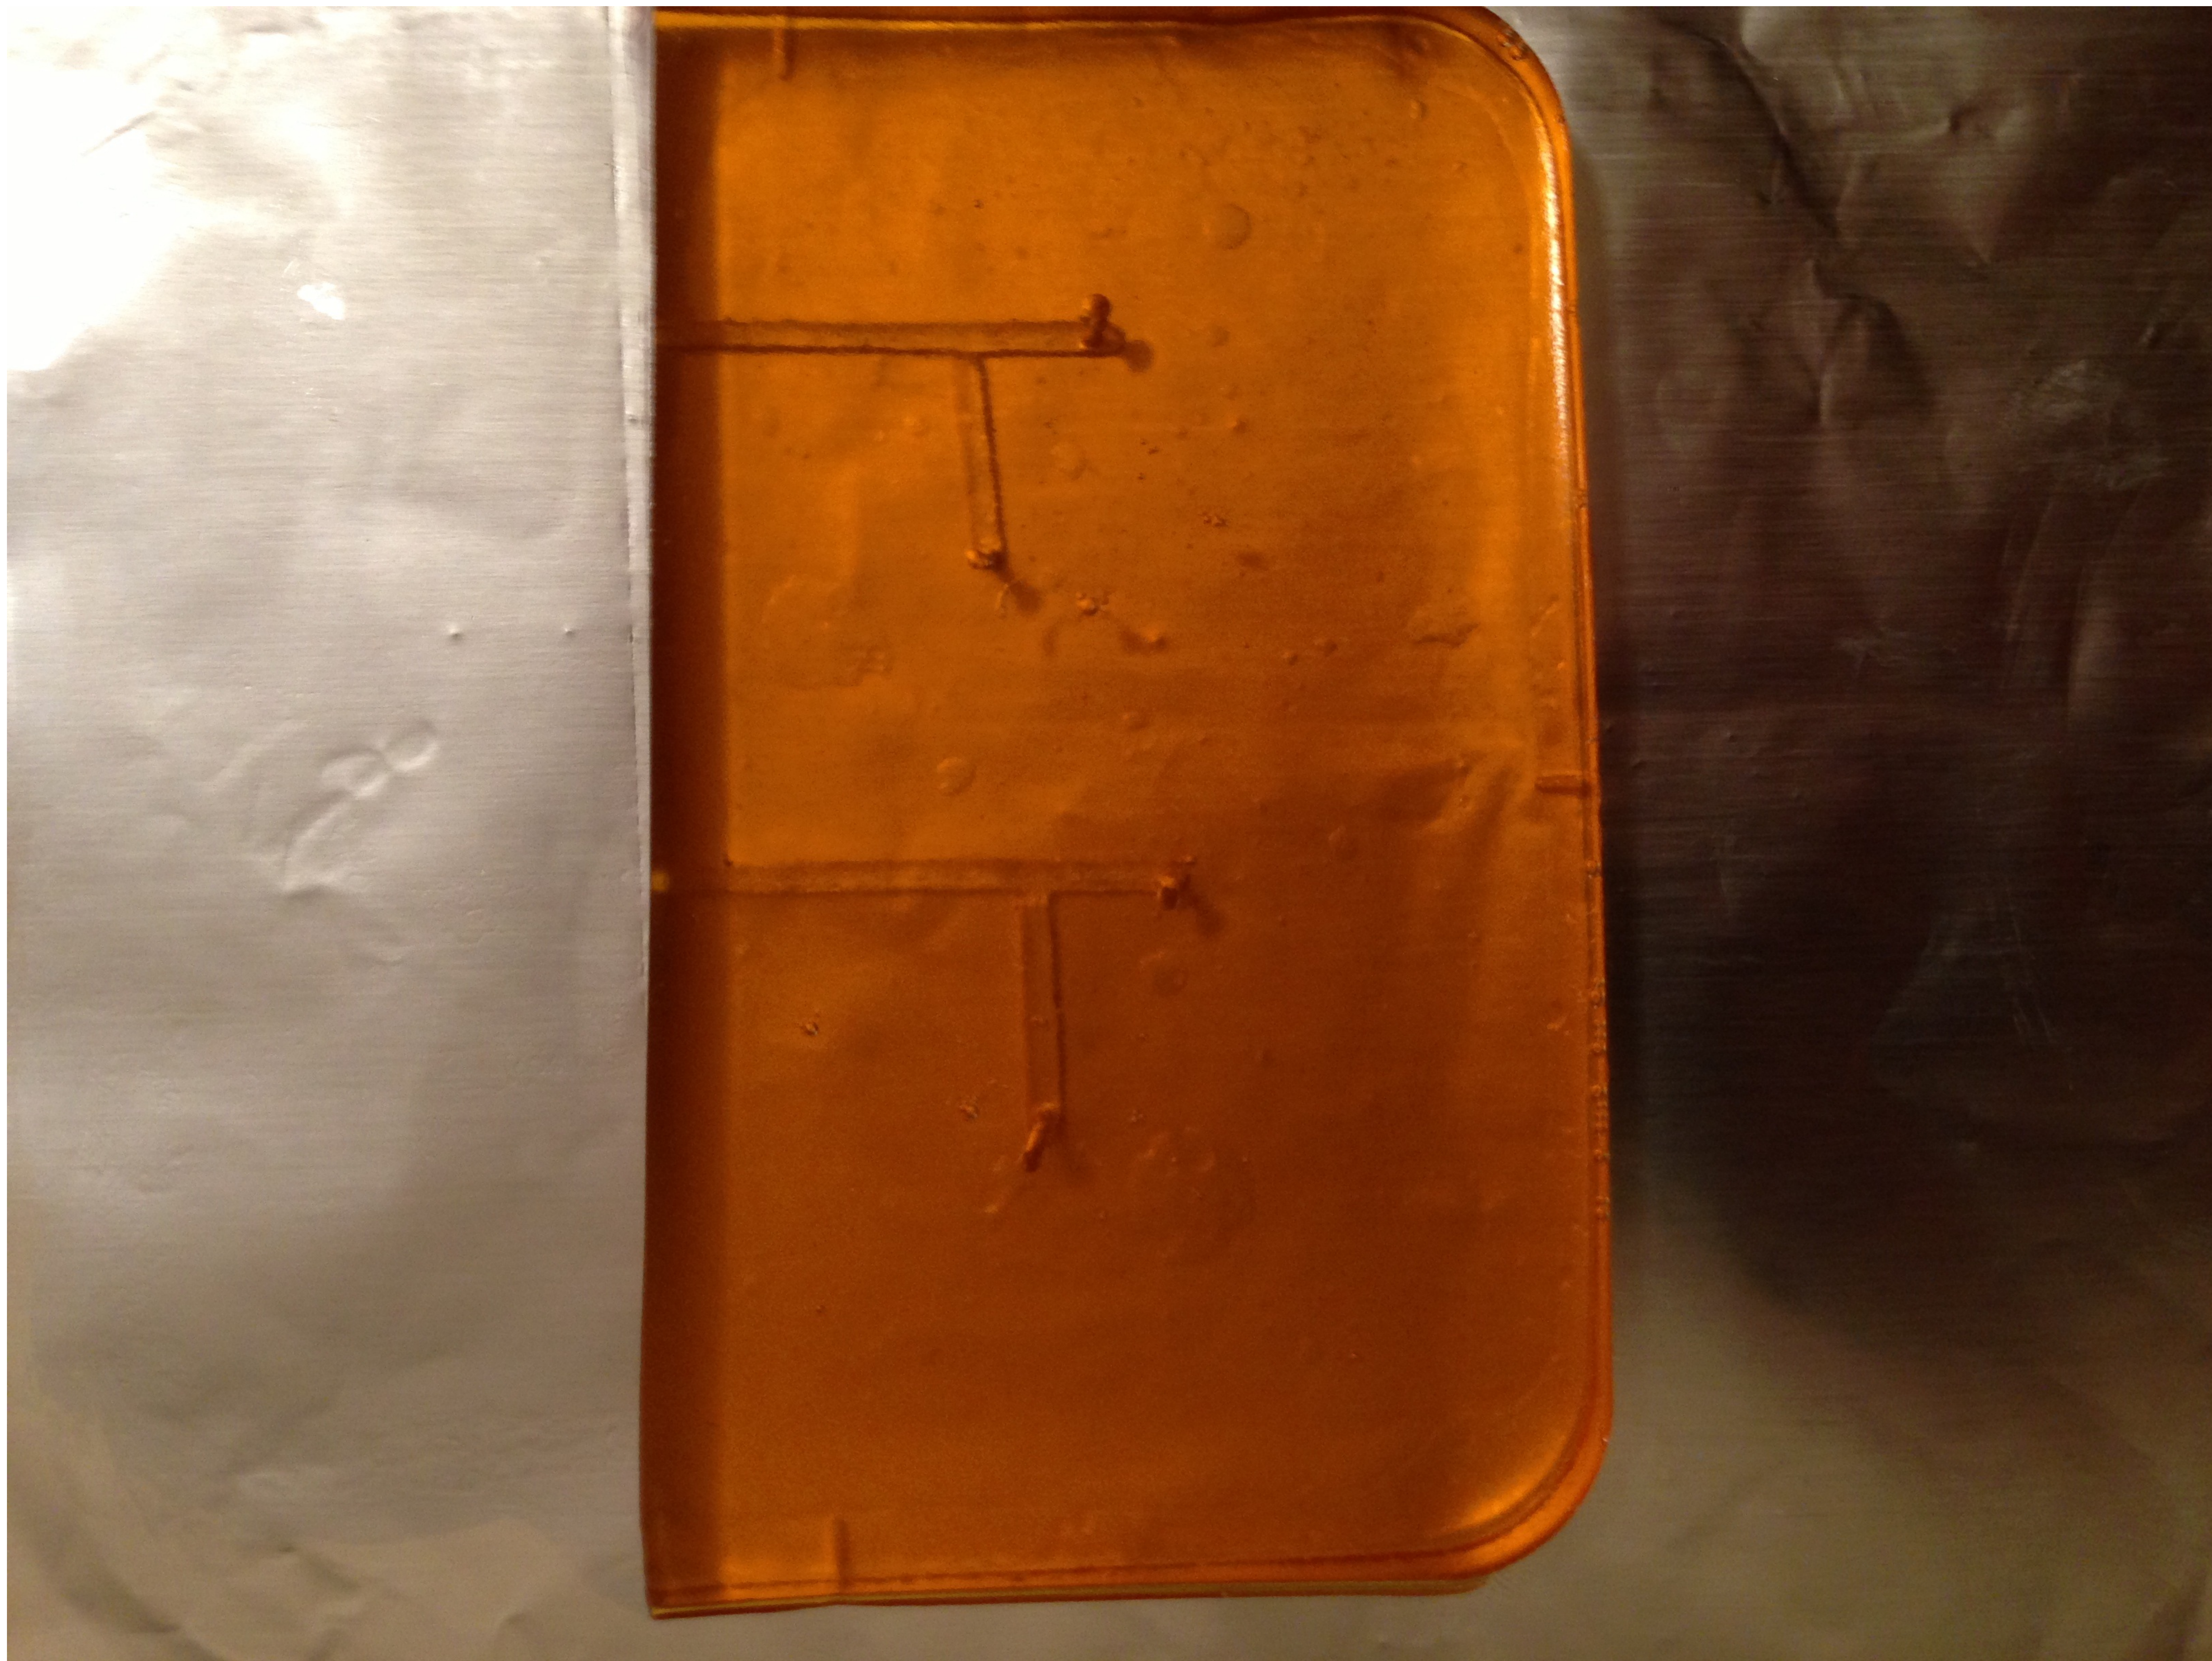

Supplement: c4lc00424h4.pdf [file c4lc00424h4.pdf]
